# Supplementary material
Source: PubMed Central journal article supplement (PMC7039410)

Gel source data of Extended Data Fig. 6a

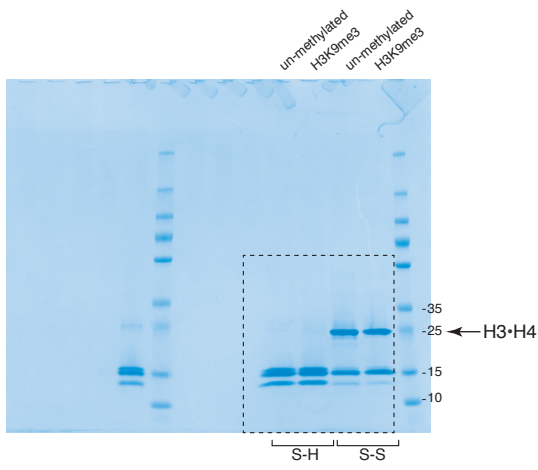

Gel source data of Extended Data Fig. 6e

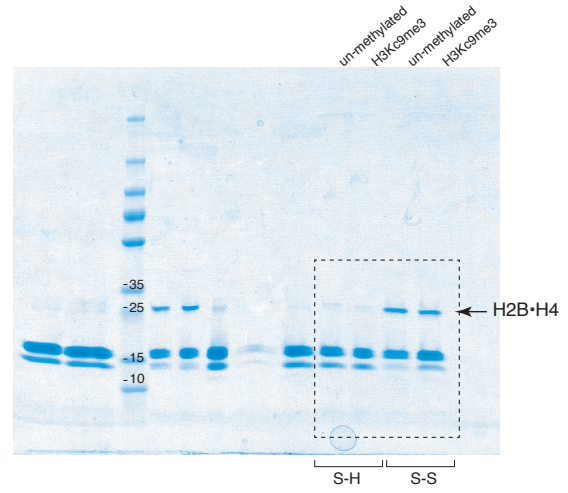

Gel source Data of Extended Data Fig. 8k

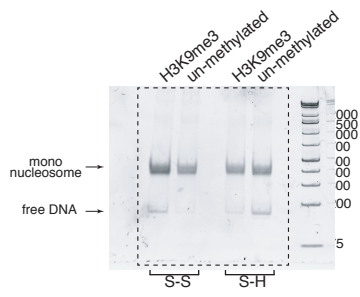

Supplement: NIHMS1540220-supplement-2.pdf [file NIHMS1540220-supplement-2.pdf]
